# Supplementary material for: ENTPD1/CD39 as a predictive marker of treatment response to gemogenovatucel-T as maintenance therapy in newly diagnosed ovarian cancer
Source: PubMed Central journal article supplement (PMC9424215; doi:10.1038/s43856-022-00163-y), 2022-08-29
Supplement: 43856_2022_163_MOESM2_ESM.pdf [file 43856_2022_163_MOESM2_ESM.pdf]

## **Description of Additional Supplementary Files**

**File Name:** Supplementary Data 1

**Description:** Supplementary Data 1 contains source data for the main figures (Figures 3-5)
