# Supplementary material for: ENTPD1/CD39 as a predictive marker of treatment response to gemogenovatucel-T as maintenance therapy in newly diagnosed ovarian cancer
Source: PubMed Central journal article supplement (PMC9424215; doi:10.1038/s43856-022-00163-y), 2022-08-29
Supplement: 43856_2022_163_MOESM5_ESM.pdf [file 43856_2022_163_MOESM5_ESM.pdf]

**Supplementary Information:** ENTPD1 as a predictive marker of treatment response to gemogenovatucel-T as maintenance therapy in newly-diagnosed ovarian cancer

Rodney P. Rocconi<sup>1</sup>, Laura Stanbery<sup>2</sup>, Min Tang<sup>3</sup>, Adam Walter<sup>4</sup>, Bradley J. Monk<sup>5</sup>,  
Thomas J. Herzog<sup>6</sup>, Robert L. Coleman<sup>7</sup>, Luisa Manning<sup>2</sup>, Gladice Wallraven<sup>2</sup>, Staci  
Horvath<sup>2</sup>, Ernest Bognar<sup>2</sup>, Neil Senzer<sup>2</sup>, Scott Brun<sup>8</sup>, John Nemunaitis<sup>2</sup>

**Supplementary Table 1.** Significant genes correlated with OS and RFS from univariate analysis.

|         | Locus          | HR<br>OS | HR<br>RFS | Min<br>Value | Max<br>Value | p value<br>OS | p value<br>RFS |
|---------|----------------|----------|-----------|--------------|--------------|---------------|----------------|
| ADORA2A | NM_000675.5    | 0.099    | 0.211     | -4.22        | -2.1         | 0.0027        | 0.0006         |
| CCL13   | NM_005408.2    | 0.221    | 0.423     | -6.83        | -2.5         | 0.0034        | 0.0014         |
| CD79B   | NM_001039933.1 | 0.308    | 0.447     | -6.31        | -3.01        | 0.0051        | 0.0044         |
| ENTPD1  | NM_001098175.1 | 0.243    | 0.481     | -3.99        | 0.61         | 0.0008        | 0.0006         |
| FAM124B | NM_001122779.1 | 0.134    | 0.178     | -6.24        | -4.24        | 0.0054        | 0.0006         |
| GZMB    | NM_004131.4    | 0.452    | 0.561     | -6.97        | -1.02        | 0.008         | 0.0009         |
| ICOS    | NM_012092.3    | 0.487    | 0.626     | -6.41        | -0.49        | 0.0088        | 0.0085         |
| IL2RA   | NM_000417.2    | 0.321    | 0.478     | -5.61        | -0.74        | 0.0097        | 0.0062         |
| LAG3    | NM_002286.5    | 0.409    | 0.56      | -4.86        | 0.61         | 0.0054        | 0.0009         |
| MRC1    | NM_002438.2    | 0.424    | 0.636     | -6.03        | -0.41        | 0.001         | 0.0096         |
| PDCD1   | NM_005018.1    | 0.314    | 0.442     | -7.49        | -3.44        | 0.006         | 0.0023         |
| PFKFB3  | NM_004566.3    | 0.206    | 0.414     | -2.51        | 0.38         | .0023         | 0.0033         |
| STAT4   | NM_001243835.1 | 0.297    | 0.531     | -5.51        | -1.62        | .0022         | 0.0039         |
